# Supplementary material for: Commensal adaptation of yeast Saccharomyces cerevisiae to grape-skin environment
Source: Research Square preprint supplement (doi:10.21203/rs.3.rs-2582209/v1), 2023-03-01
Supplement: Supplementary file 1 [file e6a7d6b44129cc3f5cd12725.pdf]

# Supplementary Fig. S1 (continued)

|         |                                                                |     |
|---------|----------------------------------------------------------------|-----|
| ApCut9  | IGDDALCGGGDPN-QG---ISSTAATISSVSGSKIKAVIFMGDPDRIQIPGASYSVGT-SK- | 166 |
| ApCut8  | IAGDILGGADI-----CAGLNPGLDPSTSPGNKIGAALIFGDNRHVADQSYNVLNGSS-    | 269 |
| ApCut7  | IVSDILGGGFGTFFQGCTTKPSPNLDVNSQVGKKVAVTTFGNTRHTANQPYNQFSGSS-    | 175 |
| ApCut4  | LVLQASSR-----L--GKKALEAIKAIILARNPYRIPGKSANVDSHGNT              | 107 |
| AaCut2  | ATVSALPK-----L--TGDSFDAVKAVFLIGNPMHKSGLCENVDTLGGK              | 153 |
| CS2C1e1 | ATVVALQQ-----LGTSGAAFNAVKGVFLIGNPDHKSGLTCNVDSNNGGT             | 167 |
| ApCut1  | ATVNALPK-----L--TGTANTAVKGVWVLDPLHKAAGLTCNIDSTGGT              | 156 |
| ApCut3  | ATVNAHPK-----L--TGANMDAVKGVFLIGDPEHRSGLACNVDANGGT              | 156 |
| ApCut2  | ATVDAMSK-----I--TGANFNAVKGVFLIGNPHHKSGLACNVDNNGGT              | 158 |
| FsCut1  | LAAASIED-----L--DSAIRDKIAGTVLFGYTKNLQNR-----                   | 172 |
| AoCutL  | VMNGAIKR-----L--SADVQDKIKGVVLFYTRNAQER-----                    | 162 |
| ApCut6  | VVHNALNS-----V--D--GSKIAAVTAFGDPMMNGQ-----                     | 174 |
| ApCut5  | QVHGALQN-----L--Q---NGQVAVALTFGDPLQRM-----                     | 172 |
| BcCutA  | LVHNAAKL-----L--PAETTAKISSAVIFGDPDNGD-----                     | 151 |
| :       |                                                                |     |
| ApCut9  | ----NPGFDPR-----PSGF--TCSAYASRIQAYCDAADPYCSNG-----NNAATHQG     | 208 |
| ApCut8  | ----VSSNDPR-----SPDSLARMNKFAGVLRSYCDQADPVCAAAG-PGFPTVDNHLN     | 317 |
| ApCut7  | ----GNGIFPR-----PAYQLANLATWTAKYHDYCVAEDEPICAGG-----DNVEDHLN    | 219 |
| ApCut4  | DARGNIGMFVTQAITSNTPIQPFPESLGKSGKVLVDYCLENDIVCASDPACDCQIAADHLS  | 167 |
| AaCut2  | STDAYANGLEAYLG----GI----PDEWVSKTMDVCFNFGDGVCCDT--LTGIGITAQHLD  | 201 |
| CS2C1e1 | TTRNVNGLSVAYQ---GSV---PSGWVSKTLDVCAYGDGVCCDT--AHGFGINAQHLS     | 216 |
| ApCut1  | TTLNVNGISQYPGS---NSI----PSGWI SRTQDVCKYGDGVCCDT--THGQGINAQHLS  | 206 |
| ApCut3  | TTKNVNGLSAVLG----GI----PAAWVPKTMDVCAVGDGVCCDT--THGFGINAQHLS    | 204 |
| ApCut2  | TTKNVNGLTVLVG----SI----PANWVGKTLDVCAVGDGVCCDT--AHGFGITAQHLS    | 206 |
| FsCut1  | -----GRIPN-----YPADRTKVFCTNTGDLVCTG--S--LIVAAPHLA              | 206 |
| AoCutL  | -----GQIAN-----FPKDKVKVYCAVGDVLCGLG--T--LIVAPPHFS              | 196 |
| ApCut6  | -----TFKG-----VDDSKVVRVYCGSSDFVCCDM--SGKTQGTGSHIS              | 209 |
| ApCut5  | -----PFRN-----IDSGRTKIYCNLGDGVCCAG--A--FIISAHLS                | 205 |
| BcCutA  | -----PVQG-----VSADRTDITCHAGDNICCG--G--SLILLAHLT                | 184 |
| * * *   |                                                                |     |
| ApCut9  | YGSEYQQAALKFVNSKLT-----                                        | 226 |
| ApCut8  | YFDRYTDDAAGWVKYMLGY-----                                       | 336 |
| ApCut7  | YFDLYSEVAASWVKEQVKAADVVSSTIVSPSSTFTSVATVPTDKAVPTTFSYSNNTATA    | 279 |
| ApCut4  | YGLVDSVQETAF-QHIVKVL A-----                                    | 187 |
| AaCut2  | YPLDANVQKMGA-DFVVKALTS-----                                    | 222 |
| CS2C1e1 | YPSDQGVQTMGY-KFAVNKLGGSA-----                                  | 239 |
| ApCut1  | YPNDATVQSMGA-KFVLGKLNA-----                                    | 227 |
| ApCut3  | YPPSSTVQSMGT-KYMVAQLNGSS-----                                  | 227 |
| ApCut2  | YKSDANVQNQGI-KFVLGKLRGT-----                                   | 228 |
| FsCut1  | YGPDARGPAPEFLIEKVRVARGSA-----                                  | 230 |
| AoCutL  | YLSDT-GDASDFLLSQLG-----                                        | 213 |
| ApCut6  | YGSNLAEAASRLAQ-IVGVKA-----                                     | 229 |
| ApCut5  | YATQDATPAAQFAKGVIGNI-----                                      | 225 |
| BcCutA  | YGMDDTTAA-AAFVKKAAGL-----                                      | 202 |
| *       |                                                                |     |
| ApCut9  | -----                                                          | 226 |
| ApCut8  | -----                                                          | 336 |
| ApCut7  | PQVTNSAALSSIQSEVLEIPTADTTVTVTDCASVDTSAIASWTSFAFAATAVVSQSVAAS   | 339 |
| ApCut4  | -----                                                          | 187 |
| AaCut2  | -----                                                          | 222 |
| CS2C1e1 | -----                                                          | 239 |
| ApCut1  | -----                                                          | 227 |
| ApCut3  | -----                                                          | 227 |
| ApCut2  | -----                                                          | 228 |
| FsCut1  | -----                                                          | 230 |
| AoCutL  | -----                                                          | 213 |
| ApCut6  | -----                                                          | 229 |
| ApCut5  | -----                                                          | 225 |
| BcCutA  | -----                                                          | 202 |
| ApCut9  | -----                                                          | 226 |
| ApCut8  | -----                                                          | 336 |
| ApCut7  | ATGAAATGSSGSKSSAPNGTHTLMPYTGAASSMSGAVTGLAIVLLGAFAMVL           | 394 |
| ApCut4  | -----                                                          | 187 |
| AaCut2  | -----                                                          | 222 |
| CS2C1e1 | -----                                                          | 239 |
| ApCut1  | -----                                                          | 227 |
| ApCut3  | -----                                                          | 227 |
| ApCut2  | -----                                                          | 228 |
| FsCut1  | -----                                                          | 230 |
| AoCutL  | -----                                                          | 213 |
| ApCut6  | -----                                                          | 229 |
| ApCut5  | -----                                                          | 225 |
| BcCutA  | -----                                                          | 202 |

## Supplementary Fig. S2

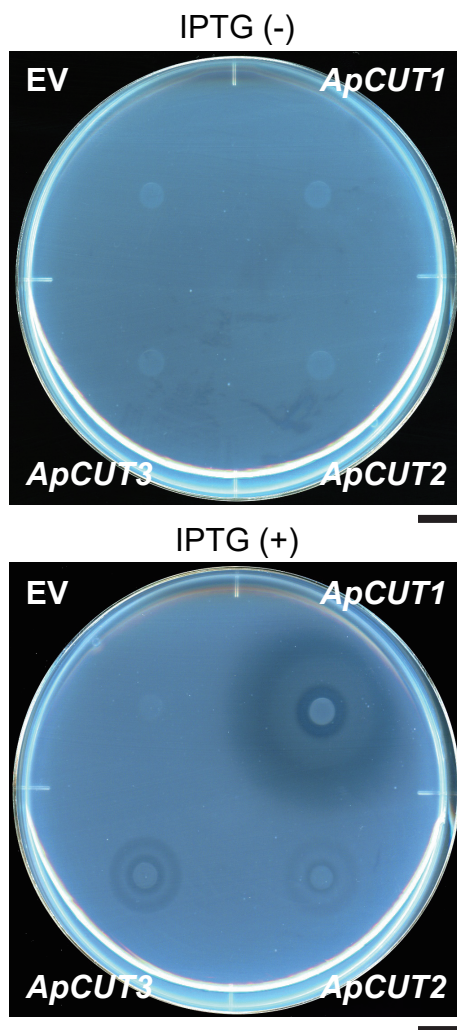

Supplementary Fig. S2 PCL-plate clearing assay of the extracts of ApCut1- to ApCut3-expressing *E. coli* cells. EV, empty vector. Bar, 1 cm.

## Supplementary Fig. S3

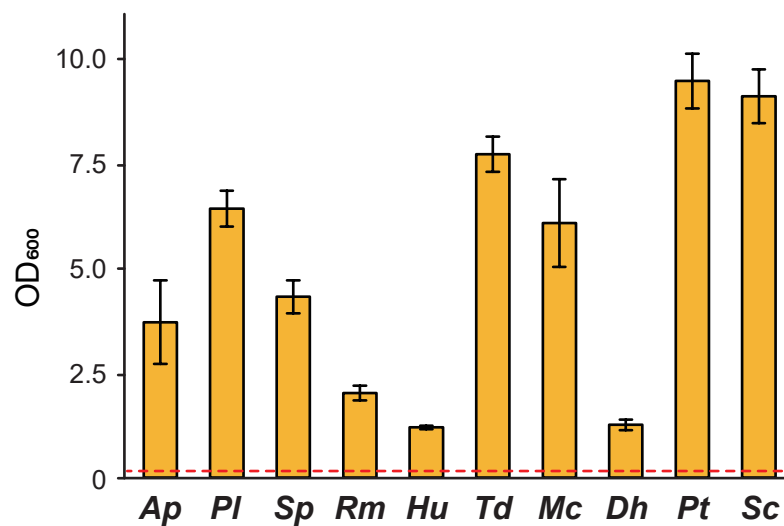

**Supplementary Fig. S3 Growth of grape-skin residents and *S. cerevisiae* in YNB medium containing 10% (w/v) glucose as a sole carbon source.** The graph indicates OD<sub>600</sub> values after the 6-d fermentation test in YNB medium containing 10% (w/v) glucose. A red dashed line shows the initial OD<sub>600</sub> value (OD<sub>600</sub> = 0.1). Data represent mean values and standard deviations from three independent experiments. *Ap*, *A. pullulans*; *Pl*, *P. laurentii*; *Sp*, *S. pararoseus*; *Rm*, *R. mucilaginosa*; *Hu*, *H. uvarum*; *Td*, *T. delbrueckii*; *Mc*, *M. caribbica*; *Dh*, *D. hansenii*; *Pt*, *P. terricola*; *Sc*, *S. cerevisiae*.

## Supplementary Fig. S4

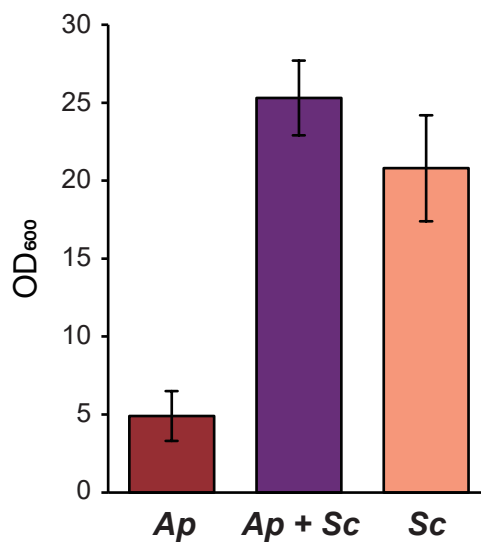

**Supplementary Fig. S4 Growth in coculture of *A. pullulans* and *S. cerevisiae* in YNB medium containing 10% glucose as a sole carbon source.** The graph indicates OD<sub>600</sub> values after the 6-d fermentation test in YNB medium containing 10% (w/v) glucose. Data represent mean values and standard deviations from three independent experiments. *Ap*, inoculated with *A. pullulans* (red); *Ap + Sc*, coinoculated with *A. pullulans* and *S. cerevisiae* (violet); *Sc*, inoculated with *S. cerevisiae* (pink).

## Supplementary Fig. S5

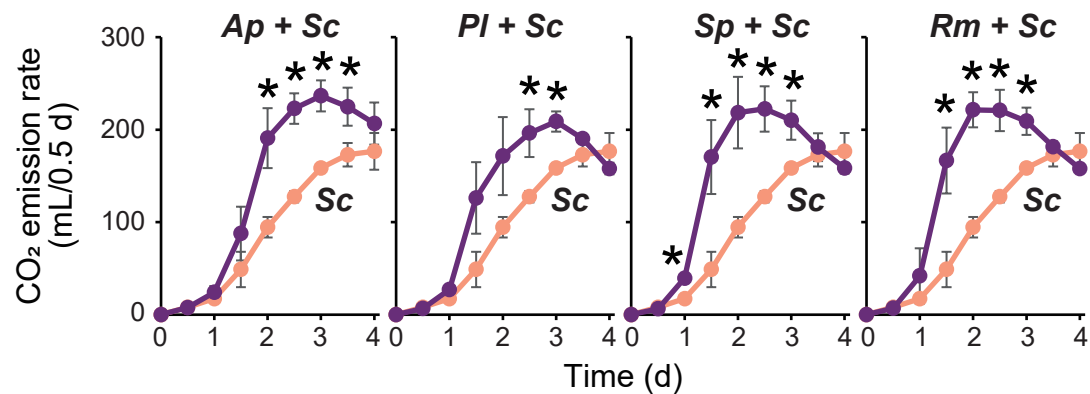

**Supplementary Fig. S5 Alcoholic fermentation of intact grapes in coculture of grape-skin residents and *S. cerevisiae*.** Carbon dioxide emission rates in a mixture of equal weight of YNB medium and intact grape berries are shown. Data represent mean values and standard deviations from two independent experiments. *Sc*, inoculated with *S. cerevisiae* (pink); *Ap + Sc*, coinoculated with *A. pullulans* and *S. cerevisiae*, *Pl + Sc*, coinoculated with *P. laurentii* and *S. cerevisiae*, *Sp + Sc*, coinoculated with *S. pararoseus* and *S. cerevisiae*, *Rm + Sc*, coinoculated with *R. mucilaginosa* and *S. cerevisiae* (violet). Asterisks indicate statistically significant increases of carbon dioxide emission compared with *Sc* (t test,  $p < 0.05$ ).

## Supplementary Fig. S6

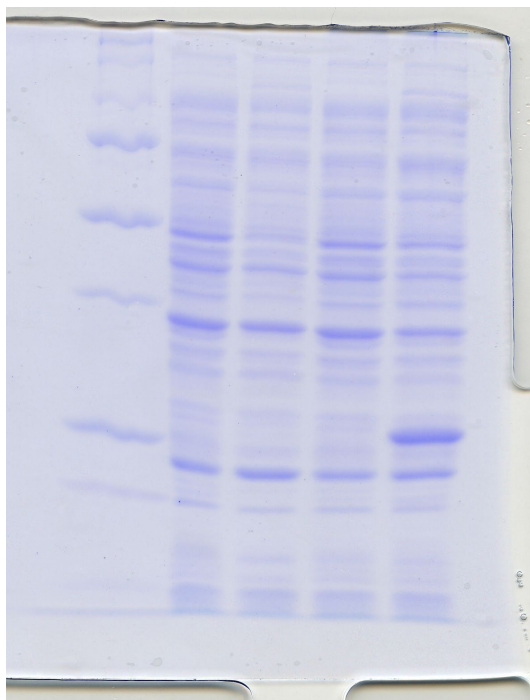

**CBB staining**

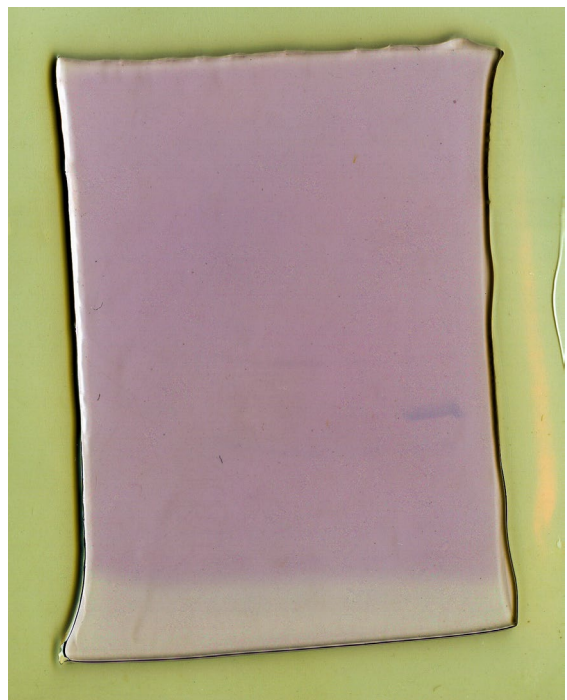

**His-detect**

Supplementary Fig. S6 Full-length gel images of Fig. 8b.

**Supplementary Table S1** Yeasts or yeast-like microorganisms isolated from grapes in this study\*.

| No. | Grape variety        | Grape species                | Isolated from                      | Yeast species                                                             | Family                    | Category                     |
|-----|----------------------|------------------------------|------------------------------------|---------------------------------------------------------------------------|---------------------------|------------------------------|
| 1   | Delaware             | <i>Vitis</i> hybrid          | Enrichment culture in water        | <i>Aureobasidium pullulans</i>                                            | Dothioraceae              | Yeast-like fungus            |
| 2   | Delaware             | <b><i>Vitis</i> hybrid</b>   | <b>Enrichment culture in water</b> | <b><i>Aureobasidium pullulans</i></b>                                     | <b>Dothioraceae</b>       | <b>Yeast-like fungus</b>     |
| 3   | Delaware             | <i>Vitis</i> hybrid          | Enrichment culture in 5% sucrose   | <i>Aureobasidium pullulans</i>                                            | Dothioraceae              | Yeast-like fungus            |
| 4   | Delaware             | <i>Vitis</i> hybrid          | Enrichment culture in 5% sucrose   | <i>Aureobasidium pullulans</i>                                            | Dothioraceae              | Yeast-like fungus            |
| 5   | Delaware             | <i>Vitis</i> hybrid          | Enrichment culture in 5% sucrose   | <i>Aureobasidium pullulans</i>                                            | Dothioraceae              | Yeast-like fungus            |
| 6   | Delaware             | <i>Vitis</i> hybrid          | Surface-washed suspensions         | <i>Sporobolomyces</i> sp.                                                 | Sporidiobolaceae          | Basidiomycetous yeast        |
| 7   | Delaware             | <i>Vitis</i> hybrid          | Surface-washed suspensions         | <i>Sporobolomyces</i> sp.                                                 | Sporidiobolaceae          | Basidiomycetous yeast        |
| 8   | Delaware             | <i>Vitis</i> hybrid          | Surface-washed suspensions         | <i>Aureobasidium pullulans</i>                                            | Dothioraceae              | Yeast-like fungus            |
| 9   | Delaware             | <i>Vitis</i> hybrid          | Surface-washed suspensions         | <i>Sporobolomyces</i> sp.                                                 | Sporidiobolaceae          | Basidiomycetous yeast        |
| 10  | Delaware             | <i>Vitis</i> hybrid          | Surface-washed suspensions         | <i>Tremella yokohamensis</i> ( <i>Cryptococcus yokohamensis</i> )         | Tremellaceae              | Basidiomycetous yeast        |
| 11  | Delaware             | <i>Vitis</i> hybrid          | Surface-washed suspensions         | <i>Tremella yokohamensis</i> ( <i>Cryptococcus yokohamensis</i> )         | Tremellaceae              | Basidiomycetous yeast        |
| 12  | Kyoho                | <i>Vitis</i> hybrid          | Juice (stem)                       | <i>Moesziomyces aphidis</i>                                               | Ustilaginaceae            | Basidiomycetous yeast        |
| 13  | Kyoho                | <i>Vitis</i> hybrid          | Juice (stem)                       | <i>Moesziomyces aphidis</i>                                               | Ustilaginaceae            | Basidiomycetous yeast        |
| 14  | Kyoho                | <i>Vitis</i> hybrid          | Juice (stem)                       | <i>Moesziomyces aphidis</i>                                               | Ustilaginaceae            | Basidiomycetous yeast        |
| 15  | Kyoho                | <i>Vitis</i> hybrid          | Juice (stem)                       | <i>Moesziomyces aphidis</i>                                               | Ustilaginaceae            | Basidiomycetous yeast        |
| 16  | Kyoho                | <i>Vitis</i> hybrid          | Juice                              | <i>Moesziomyces aphidis</i>                                               | Ustilaginaceae            | Basidiomycetous yeast        |
| 17  | Kyoho                | <i>Vitis</i> hybrid          | Juice                              | <i>Moesziomyces aphidis</i>                                               | Ustilaginaceae            | Basidiomycetous yeast        |
| 18  | Kyoho                | <b><i>Vitis</i> hybrid</b>   | <b>Juice</b>                       | <b><i>Sporidiobolus pararoseus</i> (<i>Sporobolomyces shibatanus</i>)</b> | <b>Sporidiobolaceae</b>   | <b>Basidiomycetous yeast</b> |
| 19  | Kyoho                | <i>Vitis</i> hybrid          | Juice                              | <i>Sporidiobolus pararoseus</i> ( <i>Sporobolomyces shibatanus</i> )      | Sporidiobolaceae          | Basidiomycetous yeast        |
| 20  | Kyoho                | <i>Vitis</i> hybrid          | Juice                              | <i>Sporidiobolus pararoseus</i> ( <i>Sporobolomyces shibatanus</i> )      | Sporidiobolaceae          | Basidiomycetous yeast        |
| 21  | Kyoho                | <i>Vitis</i> hybrid          | Juice                              | <i>Sporidiobolus pararoseus</i> ( <i>Sporobolomyces shibatanus</i> )      | Sporidiobolaceae          | Basidiomycetous yeast        |
| 22  | Kyoho                | <i>Vitis</i> hybrid          | Juice                              | <i>Sporobolomyces</i> sp.                                                 | Sporidiobolaceae          | Basidiomycetous yeast        |
| 23  | Kyoho                | <i>Vitis</i> hybrid          | Juice                              | <i>Aureobasidium pullulans</i>                                            | Dothioraceae              | Yeast-like fungus            |
| 24  | Kyoho                | <i>Vitis</i> hybrid          | Juice                              | <i>Aureobasidium pullulans</i>                                            | Dothioraceae              | Yeast-like fungus            |
| 25  | Shine Muscat         | <b><i>Vitis</i> hybrid</b>   | <b>Juice</b>                       | <b><i>Rhodotorula mucilaginosa</i></b>                                    | <b>Sporidiobolaceae</b>   | <b>Basidiomycetous yeast</b> |
| 26  | Shine Muscat         | <i>Vitis</i> hybrid          | Juice                              | <i>Sporobolomyces</i> sp.                                                 | Sporidiobolaceae          | Basidiomycetous yeast        |
| 27  | Shine Muscat         | <i>Vitis</i> hybrid          | Juice                              | <i>Sporobolomyces</i> sp.                                                 | Sporidiobolaceae          | Basidiomycetous yeast        |
| 28  | Shine Muscat         | <i>Vitis</i> hybrid          | Juice                              | <i>Sporobolomyces</i> sp.                                                 | Sporidiobolaceae          | Basidiomycetous yeast        |
| 29  | Shine Muscat         | <i>Vitis</i> hybrid          | Juice                              | <i>Debaryomyces hansenii</i> ( <i>Candida famata</i> )                    | Saccharomycetaceae        | Ascomycetous yeast           |
| 30  | Shine Muscat         | <b><i>Vitis</i> hybrid</b>   | <b>Juice</b>                       | <b><i>Debaryomyces hansenii</i> (<i>Candida famata</i>)</b>               | <b>Saccharomycetaceae</b> | <b>Ascomycetous yeast</b>    |
| 31  | Shine Muscat         | <i>Vitis</i> hybrid          | Juice                              | <i>Debaryomyces hansenii</i> ( <i>Candida famata</i> )                    | Saccharomycetaceae        | Ascomycetous yeast           |
| 32  | Shine Muscat         | <i>Vitis</i> hybrid          | Surface-washed suspensions         | <i>Sporobolomyces</i> sp.                                                 | Sporidiobolaceae          | Basidiomycetous yeast        |
| 33  | Shine Muscat         | <i>Vitis</i> hybrid          | Surface-washed suspensions         | <i>Sporobolomyces</i> sp.                                                 | Sporidiobolaceae          | Basidiomycetous yeast        |
| 34  | Shine Muscat         | <i>Vitis</i> hybrid          | Surface-washed suspensions         | <i>Papiliotrema aurea</i> ( <i>Cryptococcus aureus</i> )                  | Tremellaceae              | Basidiomycetous yeast        |
| 35  | Shine Muscat         | <i>Vitis</i> hybrid          | Surface-washed suspensions         | <i>Papiliotrema aurea</i> ( <i>Cryptococcus aureus</i> )                  | Tremellaceae              | Basidiomycetous yeast        |
| 36  | Kyoho                | <i>Vitis</i> hybrid          | Surface-washed suspensions         | <i>Sporobolomyces</i> sp.                                                 | Sporidiobolaceae          | Basidiomycetous yeast        |
| 37  | Kyoho                | <i>Vitis</i> hybrid          | Surface-washed suspensions         | <i>Sporobolomyces</i> sp.                                                 | Sporidiobolaceae          | Basidiomycetous yeast        |
| 38  | Kyoho                | <i>Vitis</i> hybrid          | Juice                              | <i>Sporidiobolus pararoseus</i> ( <i>Sporobolomyces shibatanus</i> )      | Sporidiobolaceae          | Basidiomycetous yeast        |
| 39  | Shine Muscat         | <i>Vitis</i> hybrid          | Fermented juice                    | <i>Meyerozyma caribbica</i> ( <i>Candida fermentati</i> )                 | Saccharomycetaceae        | Ascomycetous yeast           |
| 40  | Shine Muscat         | <i>Vitis</i> hybrid          | Fermented juice                    | <i>Meyerozyma caribbica</i> ( <i>Candida fermentati</i> )                 | Saccharomycetaceae        | Ascomycetous yeast           |
| 41  | Pinot noir           | <b><i>Vitis vinifera</i></b> | <b>Juice</b>                       | <b><i>Meyerozyma caribbica</i> (<i>Candida fermentati</i>)</b>            | <b>Saccharomycetaceae</b> | <b>Ascomycetous yeast</b>    |
| 42  | Pinot noir           | <i>Vitis vinifera</i>        | Juice                              | <i>Meyerozyma caribbica</i> ( <i>Candida fermentati</i> )                 | Saccharomycetaceae        | Ascomycetous yeast           |
| 43  | Pinot noir           | <b><i>Vitis vinifera</i></b> | <b>Juice</b>                       | <b><i>Pichia terricola</i></b>                                            | <b>Saccharomycetaceae</b> | <b>Ascomycetous yeast</b>    |
| 44  | Pinot noir           | <i>Vitis vinifera</i>        | Juice                              | <i>Pichia terricola</i>                                                   | Saccharomycetaceae        | Ascomycetous yeast           |
| 45  | Pinot noir           | <b><i>Vitis vinifera</i></b> | <b>Juice</b>                       | <b><i>Hanseniaspora uvarum</i></b>                                        | <b>Saccharomycetaceae</b> | <b>Ascomycetous yeast</b>    |
| 46  | Pinot noir           | <i>Vitis vinifera</i>        | Juice                              | <i>Hanseniaspora uvarum</i>                                               | Saccharomycetaceae        | Ascomycetous yeast           |
| 47  | Pinot noir           | <i>Vitis vinifera</i>        | Juice                              | <i>Hanseniaspora uvarum</i>                                               | Saccharomycetaceae        | Ascomycetous yeast           |
| 48  | Pinot noir           | <i>Vitis vinifera</i>        | Juice                              | <i>Zygoascus meyeriae</i> ( <i>Candida hellenica</i> )                    | Saccharomycetaceae        | Ascomycetous yeast           |
| 49  | Pinot noir           | <i>Vitis vinifera</i>        | Fermented juice                    | <i>Pichia manshurica</i>                                                  | Saccharomycetaceae        | Ascomycetous yeast           |
| 50  | Pinot noir           | <i>Vitis vinifera</i>        | Fermented juice                    | <i>Hanseniaspora uvarum</i>                                               | Saccharomycetaceae        | Ascomycetous yeast           |
| 51  | Pinot noir           | <i>Vitis vinifera</i>        | Fermented juice                    | <i>Hanseniaspora uvarum</i>                                               | Saccharomycetaceae        | Ascomycetous yeast           |
| 52  | Pinot noir           | <i>Vitis vinifera</i>        | Fermented juice                    | <i>Hanseniaspora uvarum</i>                                               | Saccharomycetaceae        | Ascomycetous yeast           |
| 53  | Pinot noir           | <i>Vitis vinifera</i>        | Fermented juice                    | <i>Meyerozyma caribbica</i> ( <i>Candida fermentati</i> )                 | Saccharomycetaceae        | Ascomycetous yeast           |
| 54  | Pinot noir           | <b><i>Vitis vinifera</i></b> | <b>Fermented juice</b>             | <b><i>Torulasporea delbrueckii</i> (<i>Candida colliculosa</i>)</b>       | <b>Saccharomycetaceae</b> | <b>Ascomycetous yeast</b>    |
| 55  | Pinot noir           | <i>Vitis vinifera</i>        | Surface-washed suspensions         | <i>Meyerozyma caribbica</i> ( <i>Candida fermentati</i> )                 | Saccharomycetaceae        | Ascomycetous yeast           |
| 56  | Pinot noir           | <i>Vitis vinifera</i>        | Surface-washed suspensions         | <i>Meyerozyma guilliermondii</i> ( <i>Candida guilliermondii</i> )        | Saccharomycetaceae        | Ascomycetous yeast           |
| 57  | Pinot noir           | <i>Vitis vinifera</i>        | Surface-washed suspensions         | <i>Hanseniaspora uvarum</i>                                               | Saccharomycetaceae        | Ascomycetous yeast           |
| 58  | Pinot noir           | <i>Vitis vinifera</i>        | Surface-washed suspensions         | <i>Hanseniaspora uvarum</i>                                               | Saccharomycetaceae        | Ascomycetous yeast           |
| 59  | Pinot noir           | <i>Vitis vinifera</i>        | Surface-washed suspensions         | <i>Hanseniaspora uvarum</i>                                               | Saccharomycetaceae        | Ascomycetous yeast           |
| 60  | Seto Giants          | <i>Vitis</i> hybrid          | Surface-washed suspensions         | <i>Sporidiobolus pararoseus</i> ( <i>Sporobolomyces shibatanus</i> )      | Sporidiobolaceae          | Basidiomycetous yeast        |
| 61  | Seto Giants          | <i>Vitis</i> hybrid          | Fermented juice                    | <i>Rhodotorula paludigena</i>                                             | Sporidiobolaceae          | Basidiomycetous yeast        |
| 62  | Seto Giants          | <i>Vitis</i> hybrid          | Fermented juice                    | <i>Rhodotorula paludigena</i>                                             | Sporidiobolaceae          | Basidiomycetous yeast        |
| 63  | Muscat of Alexandria | <i>Vitis vinifera</i>        | Fermented juice                    | <i>Trichosporon asahii</i>                                                | Trichosporonaceae         | Basidiomycetous yeast        |
| 64  | Muscat of Alexandria | <i>Vitis vinifera</i>        | Fermented juice                    | <i>Trichosporon asahii</i>                                                | Trichosporonaceae         | Basidiomycetous yeast        |
| 65  | Gorbi                | <i>Vitis</i> hybrid          | Fermented juice                    | <i>Meyerozyma guilliermondii</i> ( <i>Candida guilliermondii</i> )        | Saccharomycetaceae        | Ascomycetous yeast           |
| 66  | Gorbi                | <i>Vitis</i> hybrid          | Fermented juice                    | <i>Meyerozyma guilliermondii</i> ( <i>Candida guilliermondii</i> )        | Saccharomycetaceae        | Ascomycetous yeast           |
| 67  | Pinot noir           | <i>Vitis vinifera</i>        | Surface-washed suspensions         | <i>Hanseniaspora uvarum</i>                                               | Saccharomycetaceae        | Ascomycetous yeast           |
| 68  | Pinot noir           | <i>Vitis vinifera</i>        | Surface-washed suspensions         | <i>Hanseniaspora uvarum</i>                                               | Saccharomycetaceae        | Ascomycetous yeast           |
| 69  | Pinot noir           | <i>Vitis vinifera</i>        | Surface-washed suspensions         | <i>Hanseniaspora uvarum</i>                                               | Saccharomycetaceae        | Ascomycetous yeast           |
| 70  | Pinot noir           | <b><i>Vitis vinifera</i></b> | <b>Surface-washed suspensions</b>  | <b><i>Papiliotrema laurentii</i> (<i>Cryptococcus laurentii</i>)</b>      | <b>Tremellaceae</b>       | <b>Basidiomycetous yeast</b> |
| 71  | Pinot noir           | <i>Vitis vinifera</i>        | Surface-washed suspensions         | <i>Papiliotrema laurentii</i> ( <i>Cryptococcus laurentii</i> )           | Tremellaceae              | Basidiomycetous yeast        |
| 72  | Pinot noir           | <i>Vitis vinifera</i>        | Surface-washed suspensions         | <i>Papiliotrema flavescens</i> ( <i>Cryptococcus flavescens</i> )         | Tremellaceae              | Basidiomycetous yeast        |
| 73  | Pinot noir           | <i>Vitis vinifera</i>        | Enrichment culture in water        | <i>Hanseniaspora uvarum</i>                                               | Saccharomycetaceae        | Ascomycetous yeast           |
| 74  | Pinot noir           | <i>Vitis vinifera</i>        | Enrichment culture in water        | <i>Hanseniaspora uvarum</i>                                               | Saccharomycetaceae        | Ascomycetous yeast           |
| 75  | Pinot noir           | <i>Vitis vinifera</i>        | Enrichment culture in water        | <i>Papiliotrema laurentii</i> ( <i>Cryptococcus laurentii</i> )           | Tremellaceae              | Basidiomycetous yeast        |
| 76  | Pinot noir           | <i>Vitis vinifera</i>        | Enrichment culture in water        | <i>Papiliotrema laurentii</i> ( <i>Cryptococcus laurentii</i> )           | Tremellaceae              | Basidiomycetous yeast        |

\*All clones shared >99% nucleotide identity in the rRNA gene ITS region, based on NCBI BLAST searches.
